# Supplementary material for: Role of Fc in Antibody-Mediated Protection from Ricin Toxin
Source: MDPI journal article supplement (doi:10.3390/toxins6051512), 2014-05-07
Supplement: s1 [file s1]

## Supplementary Information

**Figure S1.** Biacore analysis to determine the concentration of anti-ricin Ab in polyclonal Fab/F(ab')<sub>2</sub> preparations. Serial dilutions of Ab or fragments (30–250 nM, based on total protein concentration) were captured on a ricin-coated sensor chip under mass transport limited conditions (flow rate 5 µL/min) or non-mass transport limited (100 µL/min) conditions. Concentration of anti-ricin Ab or fragment was determined according to the following calculations [21].

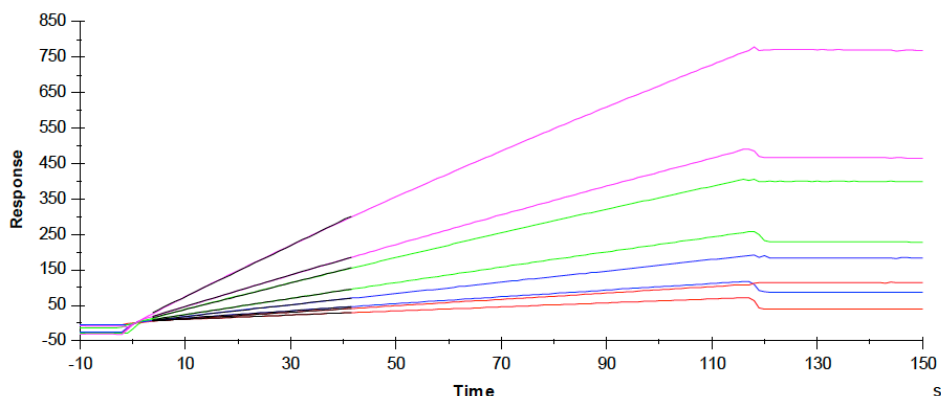

The concentration of the analyte [A<sub>bulk</sub>] is calculated by the following equation:

$$[A_{\text{bulk}}] = \frac{\frac{1}{L_{m1}} - \frac{1}{L_{m2}}}{\text{MW} \cdot G \cdot \left( \frac{1}{\frac{dR_1}{dt_1}} - \frac{1}{\frac{dR_2}{dt_2}} \right)}$$

$L_m$  = mass transport coefficient

MW = 100,000g/mole for F(AB')<sub>2</sub>

$G$  = 1000RU · mm<sup>2</sup>/ng = 1x10<sup>6</sup> RU · m<sup>2</sup>/g

$dR/dt$  = linear slope (measured within the first ~36s of binding where  $k_d$  is negligible) of 2 curves

1. Mass transport limited (flow 5 µL/min)       $\text{flw}_5 = 8.33 \times 10^{-11} \text{ m}^3/\text{s}$
2. Non mass transport (flow 100 µL/min)       $\text{flw}_{100} = 1.67 \times 10^{-9} \text{ m}^3/\text{s}$

$L_m$  in m/s is calculated as follows:

$$L_m = \sqrt[3]{\frac{D^2 \cdot \text{flw}}{h^2 \cdot w \cdot l}}$$

$h$  height of the flow cell = 1.8 x 10<sup>-5</sup> m

$w$  width of the flow cell = 5 x 10<sup>-4</sup> m

$l$  length of the flow cell = 1.6 x 10<sup>-3</sup> m

$D$  the diffusion coefficient for F(AB')<sub>2</sub> at 37°C calculated as follows:

$$D = \frac{1.0 \times 10^{-11} \cdot 324.3 \cdot \text{MW}^{-\left(\frac{1}{3}\right)} \cdot C_{t37}}{\frac{f}{f_o} \cdot \frac{v}{v_o}}$$

$f/f_o$  friction factor = 1.2

$v/v_o$  solution viscosity = 0.89

$C_{t37}$  conversion to 37°C = 1.06
